# Supplementary material for: Identification of a NACC1-Regulated Gene Signature Implicated in the Features of Triple-Negative Breast Cancer
Source: MDPI journal article supplement (doi:10.3390/biomedicines11041223), 2023-04-20
Supplement: s1 [file s1]

# Supplementary Figures and legends.

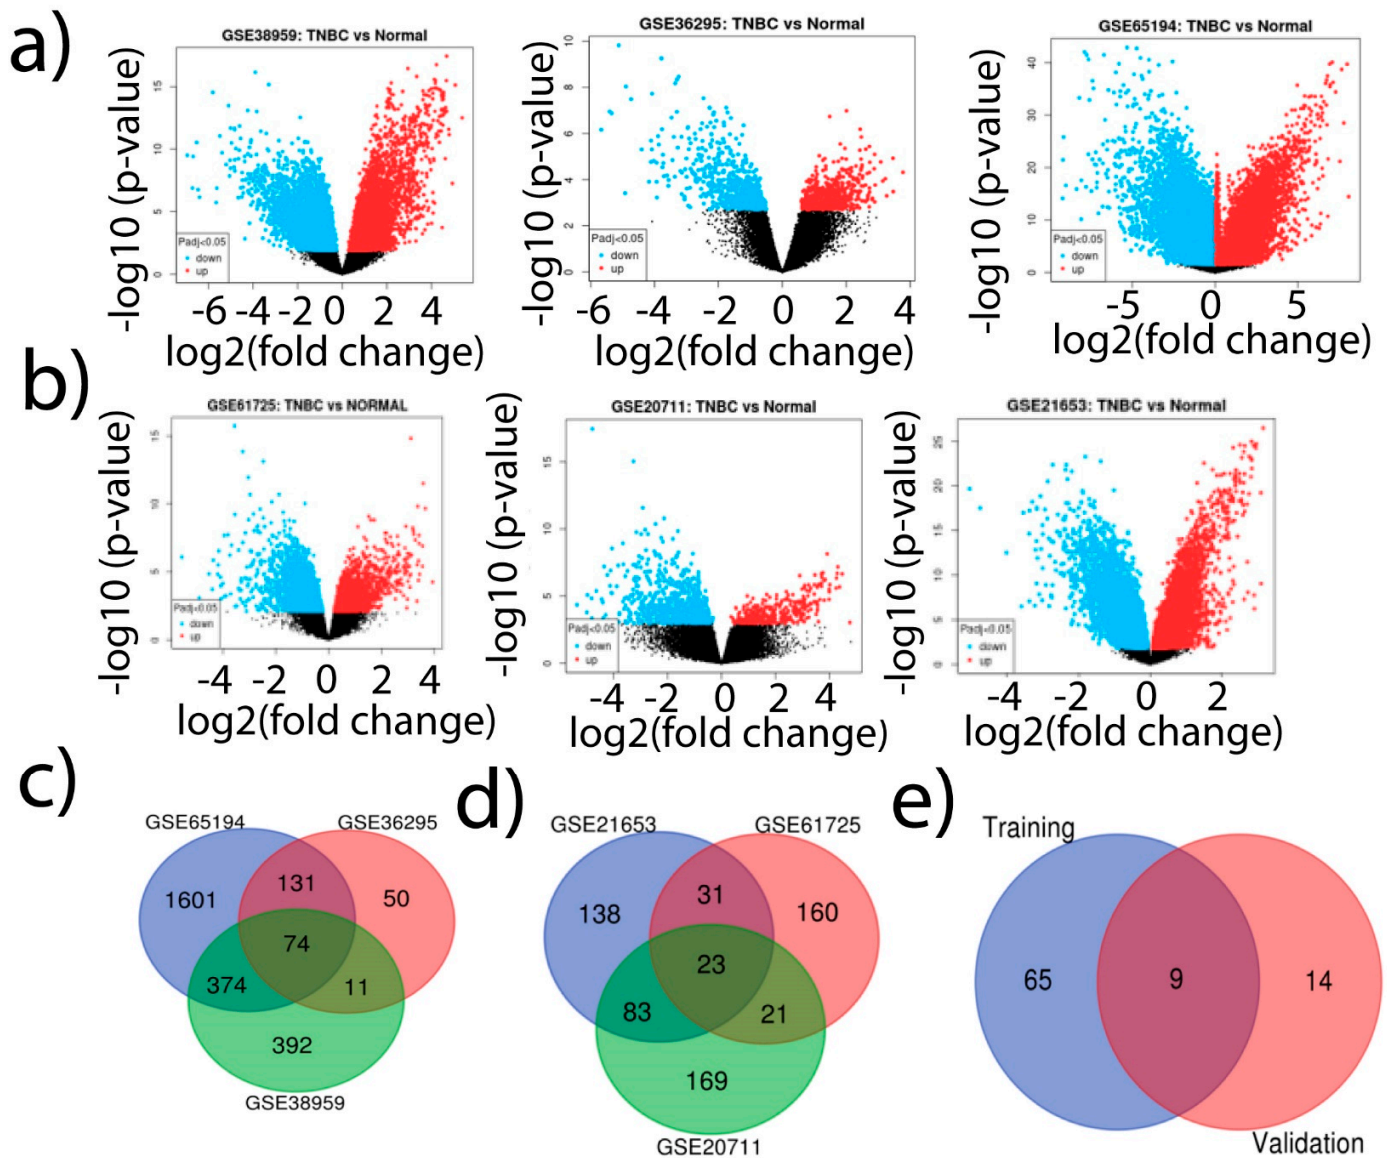

**S. Figure 1. Identification of the common upregulated and downregulated genes in TNBC.** (a) Training group datasets volcanos; (b) Validation group datasets volcanos. Color code: Blue represents downregulated genes; red represents the upregulated genes; (c) The common downregulated genes in the training group; (d) The common downregulated genes in the validation group; (e) The common downregulated genes in the training and validation groups.

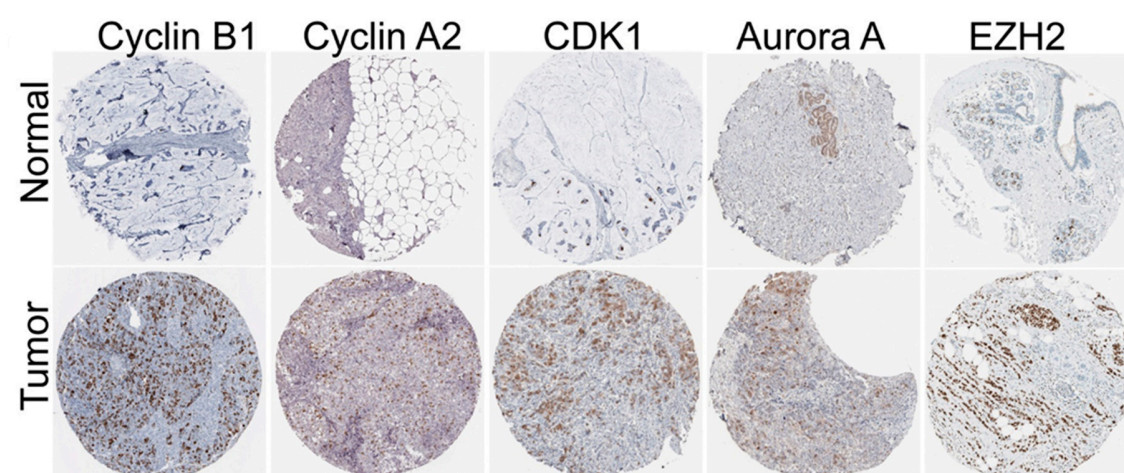

**S. Figure 2.** Expression of the stemness-associated proteins in BC vs. normal tissues samples from the human protein atlas.

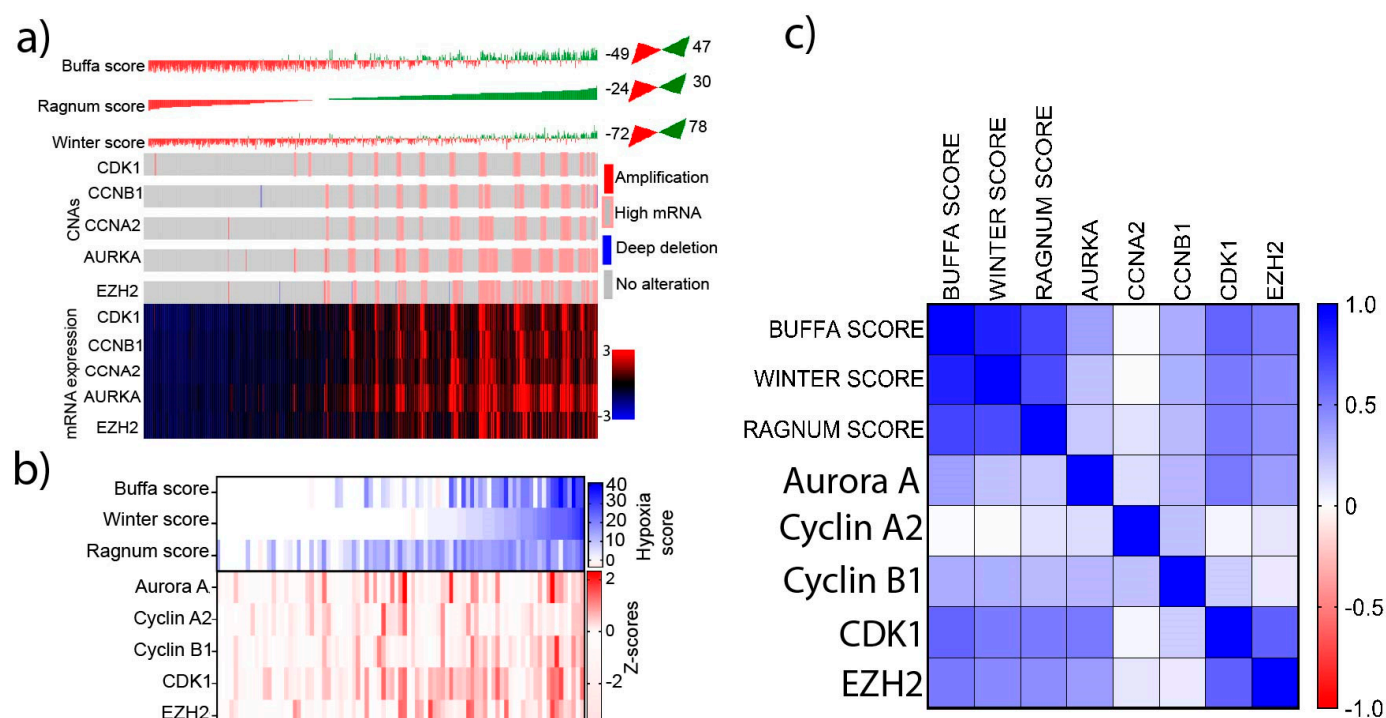

**S. Figure 3.** Correlation of the signature genes expression with tumor hypoxic status. (a) CNAs and mRNA expression profiles of signature genes with accompanying changes of hypoxia status in TCGA samples. Green color code represents high hypoxia and red color code represents low hypoxia; (b) Protein expressions of the signature genes in CPTAC samples vs. hypoxia conditions; (c) Correlation of protein expressions of the signature genes with hypoxia signature scores.

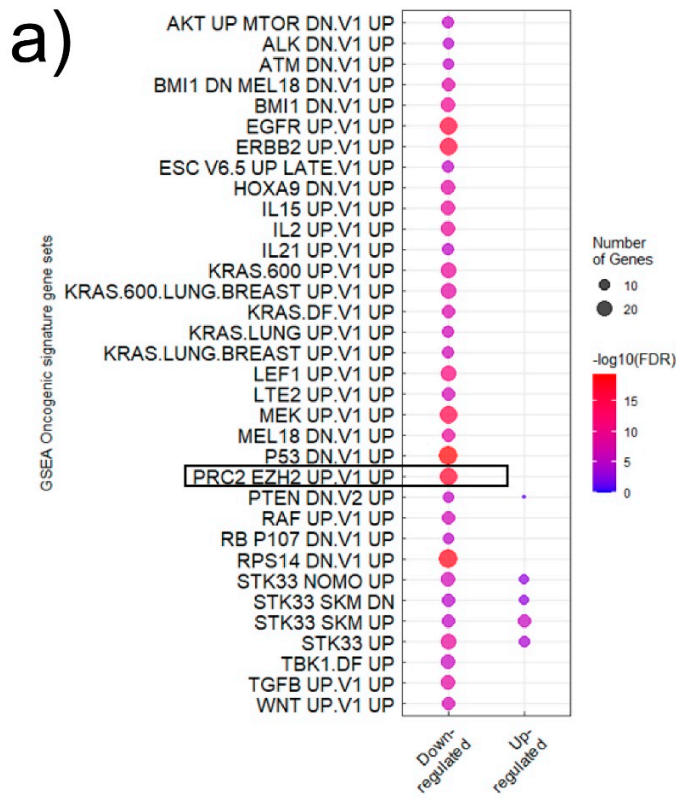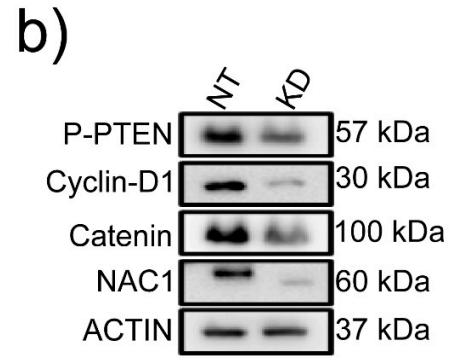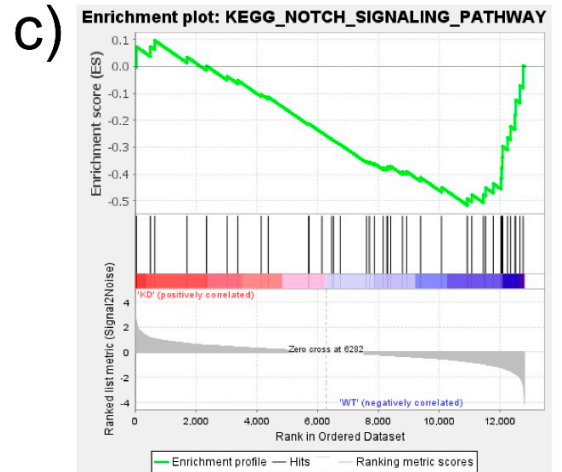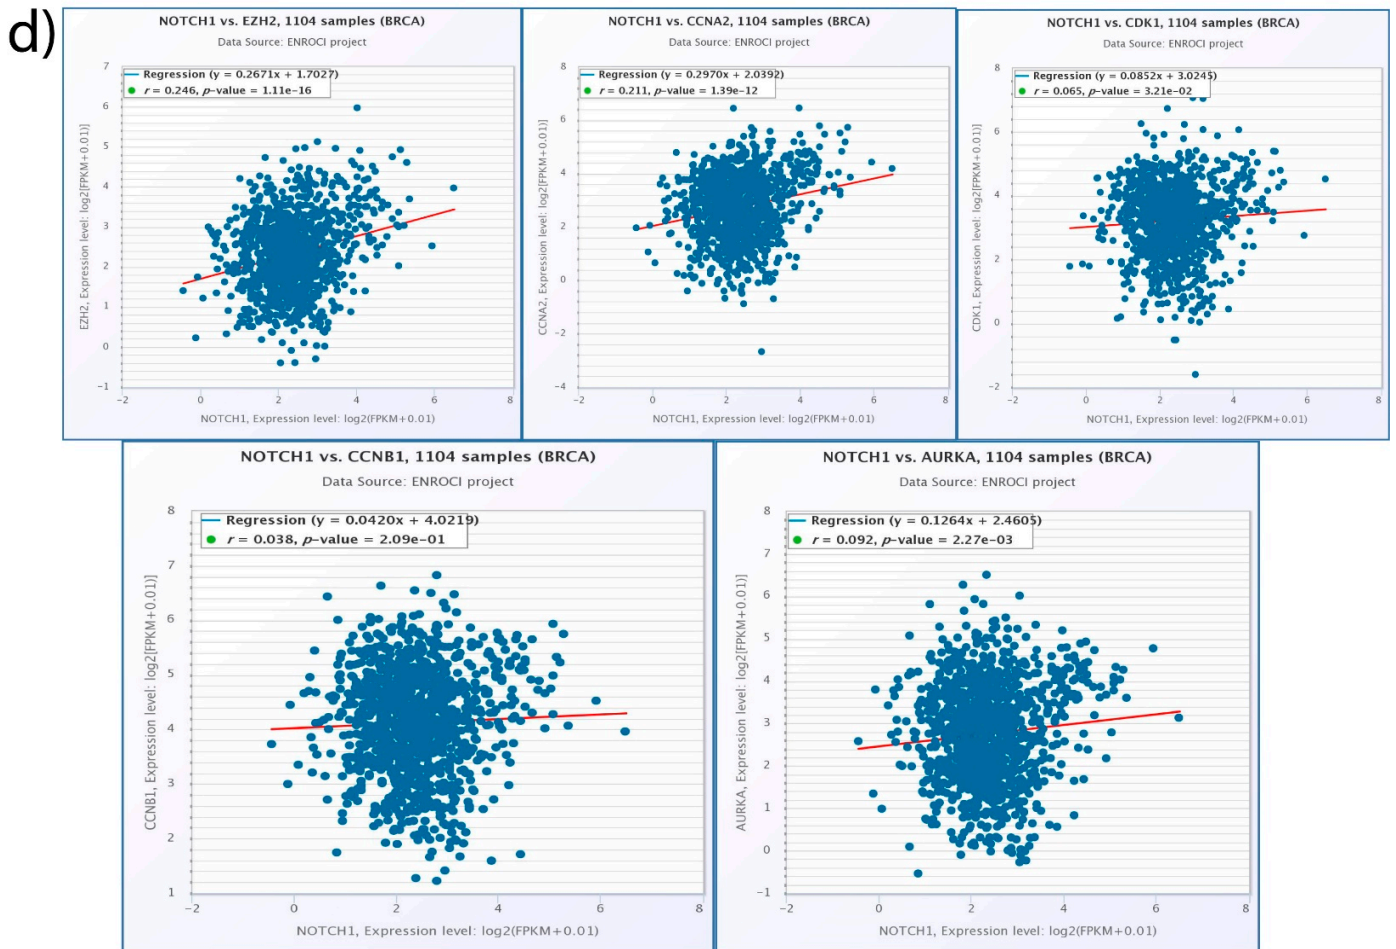

**S. Figure 4. Analysis of the RNA seq data from the NACC1-depleted tumor cells and *in vitro* validation of affected pathways.** (a) GSEA oncogenic signature analysis of RNA-seq data from tumor cells with NAC1 depletion vs. tumor cells without NAC1 depletion; (b) Western blot analysis to validate the changes of the related pathways in MDA-MB-231 cells with NAC1 depletion. (c) KEGG NOTCH pathway PGSEA enrichment from NAC1 depleted cells RNA seq data. (d) Analysis of the NOTCH pathway correlation with the identified signature genes.

**S. Table 1. Interaction scores of the signature genes**

| Interaction scores of the signature genes |       |       |
|-------------------------------------------|-------|-------|
| node1                                     | node2 | score |
| CDK1                                      | CCNB1 | 0.999 |
| CDK1                                      | CCNA2 | 0.999 |
| CCNB1                                     | CDK1  | 0.999 |
| CCNA2                                     | CDK1  | 0.999 |
| CCNB1                                     | AURKA | 0.986 |
| CCNA2                                     | AURKA | 0.986 |
| AURKA                                     | CCNA2 | 0.986 |
| AURKA                                     | CCNB1 | 0.986 |
| EZH2                                      | CDK1  | 0.98  |
| CDK1                                      | EZH2  | 0.98  |
| CCNB1                                     | CCNA2 | 0.976 |
| CCNA2                                     | CCNB1 | 0.976 |
| CDK1                                      | AURKA | 0.975 |
| AURKA                                     | CDK1  | 0.975 |
| EZH2                                      | CCNA2 | 0.76  |
| CCNA2                                     | EZH2  | 0.76  |
| EZH2                                      | CCNB1 | 0.654 |
| CCNB1                                     | EZH2  | 0.654 |
| EZH2                                      | AURKA | 0.644 |
| AURKA                                     | EZH2  | 0.644 |



**S. Table 2. Validation of the signature genes**

| Term description                          | observed gene count | background gene count | strength | false discovery rate | matching SGs in network         |
|-------------------------------------------|---------------------|-----------------------|----------|----------------------|---------------------------------|
| Histone phosphorylation                   | 4                   | 31                    | 2.7      | 4.69E-07             | AURKA, CCNB1, CCNA2, CDK1       |
| Regeneration                              | 5                   | 157                   | 2.1      | 4.69E-07             | AURKA, CCNB1, CCNA2, EZH2, CDK1 |
| Animal organ regeneration                 | 4                   | 75                    | 2.32     | 5.25E-06             | AURKA, CCNA2, EZH2, CDK1        |
| Histone modification                      | 5                   | 351                   | 1.75     | 6.22E-06             | AURKA, CCNB1, CCNA2, EZH2, CDK1 |
| G2/M transition of mitotic cell cycle     | 4                   | 134                   | 2.07     | 1.89E-05             | AURKA, CCNB1, CCNA2, CDK1       |
| Positive regulation of cell cycle process | 4                   | 294                   | 1.73     | 0.0002               | AURKA, CCNB1, EZH2, CDK1        |
| DNA damage response                       | 3                   | 59                    | 2.3      | 0.00022              | AURKA, CCNB1, CDK1              |
| Cell cycle process                        | 5                   | 976                   | 1.3      | 0.00022              | AURKA, CCNB1, CCNA2, EZH2, CDK1 |

**S. Table 3. WIKIpathway analysis of the five signature genes.**

| Term description                              | observed gene count | background gene count | strength | false discovery rate | matching SGs in network |
|-----------------------------------------------|---------------------|-----------------------|----------|----------------------|-------------------------|
| Retinoblastoma gene in cancer                 | 3                   | 87                    | 2.13     | 0.00063              | CCNB1, CCNA2, CDK1      |
| Cell cycle                                    | 3                   | 119                   | 1.99     | 0.00079              | CCNB1, CCNA2, CDK1      |
| ATM signaling pathway                         | 2                   | 39                    | 2.3      | 0.0096               | CCNB1, CDK1             |
| AMP-activated protein kinase (AMPK) signaling | 2                   | 68                    | 2.06     | 0.0189               | CCNB1, CCNA2            |
| miRNA regulation of DNA damage response       | 2                   | 70                    | 2.05     | 0.0189               | CCNB1, CDK1             |
| G1 to S cell cycle control                    | 2                   | 64                    | 2.09     | 0.0189               | CCNB1, CDK1             |
| DNA damage response                           | 2                   | 67                    | 2.07     | 0.0189               | CCNB1, CDK1             |
